# Supplementary material for: Optical characterization of surface adlayers and their compositional demixing at the nanoscale
Source: PubMed Central journal article supplement (PMC5897338; doi:10.1038/s41467-018-03820-w), 2018-04-12
Supplement: 41467_2018_3820_MOESM1_ESM.pdf [file 41467_2018_3820_MOESM1_ESM.pdf]

## Supplementary Information

### **Optical characterization of surface adlayers and their compositional demixing at the nanoscale**

Limin Xiang<sup>1</sup>, Michal Wojcik<sup>1</sup>, Samuel J. Kenny<sup>1</sup>, Rui Yan<sup>1</sup>, Seonah Moon<sup>1</sup>, Wan Li<sup>1</sup>, Ke Xu<sup>\*1,2</sup>

1. Department of Chemistry, University of California, Berkeley, California 94720, USA

2. Chan Zuckerberg Biohub, San Francisco, California 94158, USA

\*Correspondence to: [xuk@berkeley.edu](mailto:xuk@berkeley.edu)

## Table of contents

|                         |                                                                             |    |
|-------------------------|-----------------------------------------------------------------------------|----|
| Supplementary Figure 1  | Additional SR-PAINT images of TCE and chloroform adlayers                   | 3  |
| Supplementary Figure 2  | The adlayers are highly stable under imaging conditions                     | 4  |
| Supplementary Figure 3  | SR-PAINT results using Merocyanine 540                                      | 5  |
| Supplementary Figure 4  | Additional AFM images of TCE and chloroform adlayers                        | 6  |
| Supplementary Figure 5  | AFM results under different modes                                           | 7  |
| Supplementary Figure 6  | Additional SR-PAINT images of tetrahydrothiophene adlayers                  | 8  |
| Supplementary Figure 7  | Additional SR-PAINT images, and AFM images of ethyl acetate adlayers        | 9  |
| Supplementary Figure 8  | Additional SR-PAINT images, and AFM images of dichloromethane adlayers      | 10 |
| Supplementary Figure 9  | SR-PAINT images of nitroethane adlayers                                     | 11 |
| Supplementary Figure 10 | Additional SR-PAINT images, and AFM images of nitromethane adlayers         | 12 |
| Supplementary Figure 11 | Additional SR-PAINT images for ethyl acetoacetate adlayers                  | 13 |
| Supplementary Figure 12 | Additional SR-PAINT results of the adlayers of a 1:3 TCE-chloroform mixture | 14 |

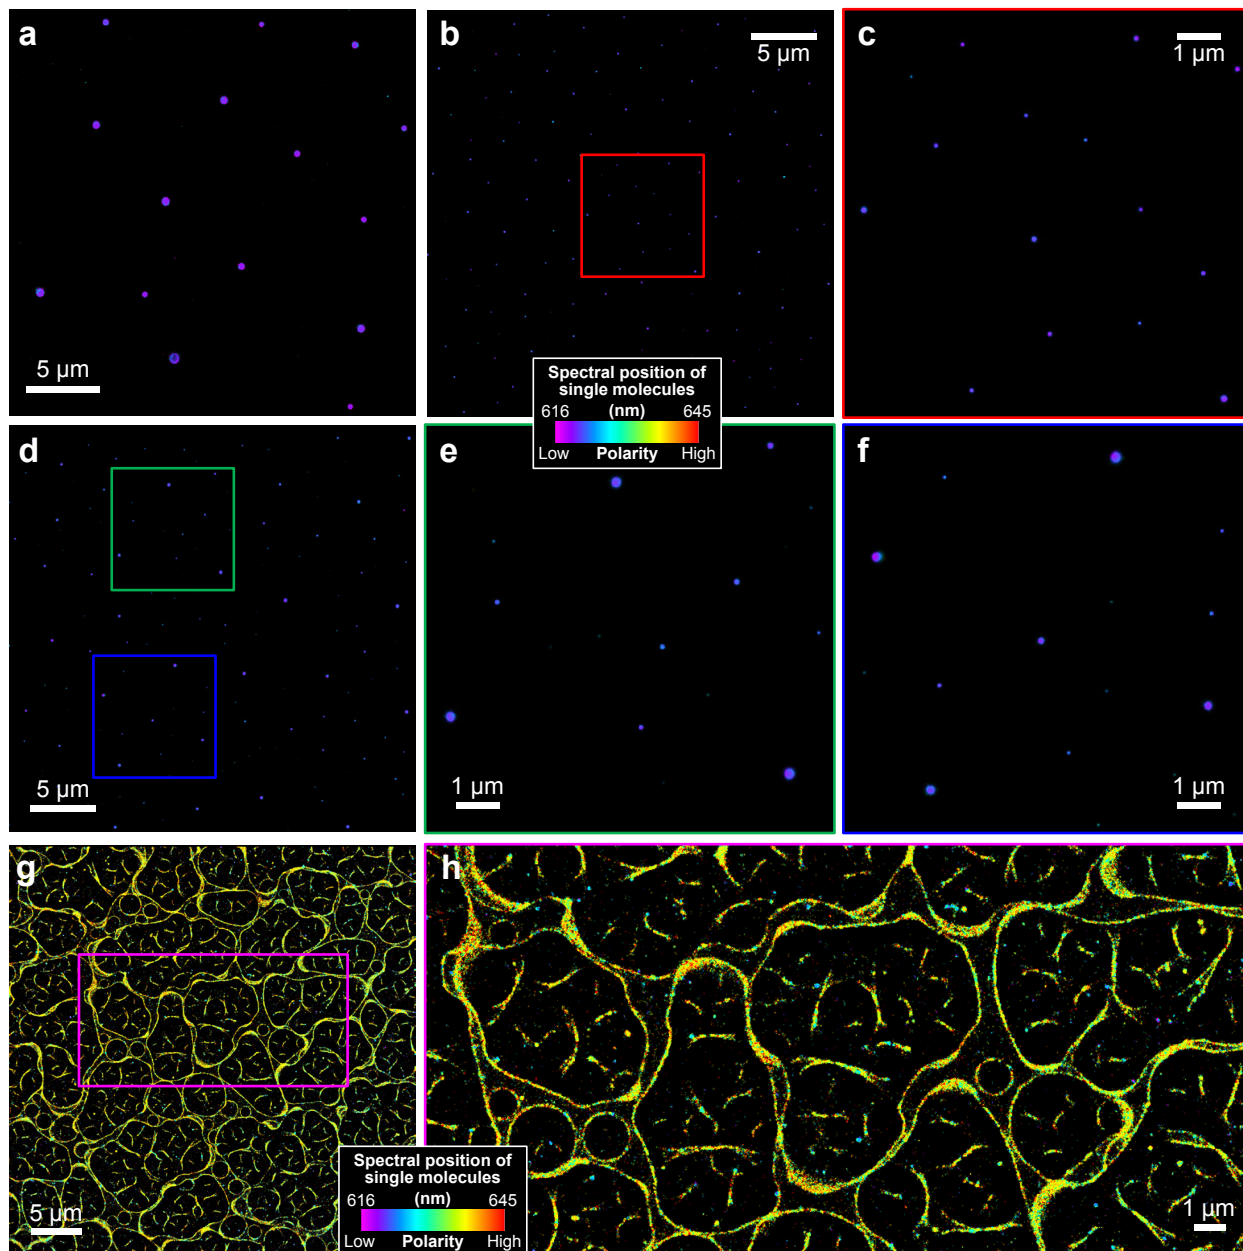

**Supplementary Figure 1 | Additional SR-PAINT images of TCE and chloroform adlayers. a-f, TCE adlayers. c is a zoom-in of the box in b. e and f are zoom-ins of the boxes in d. g-h, chloroform adlayers. h is a zoom-in of the box in g.**

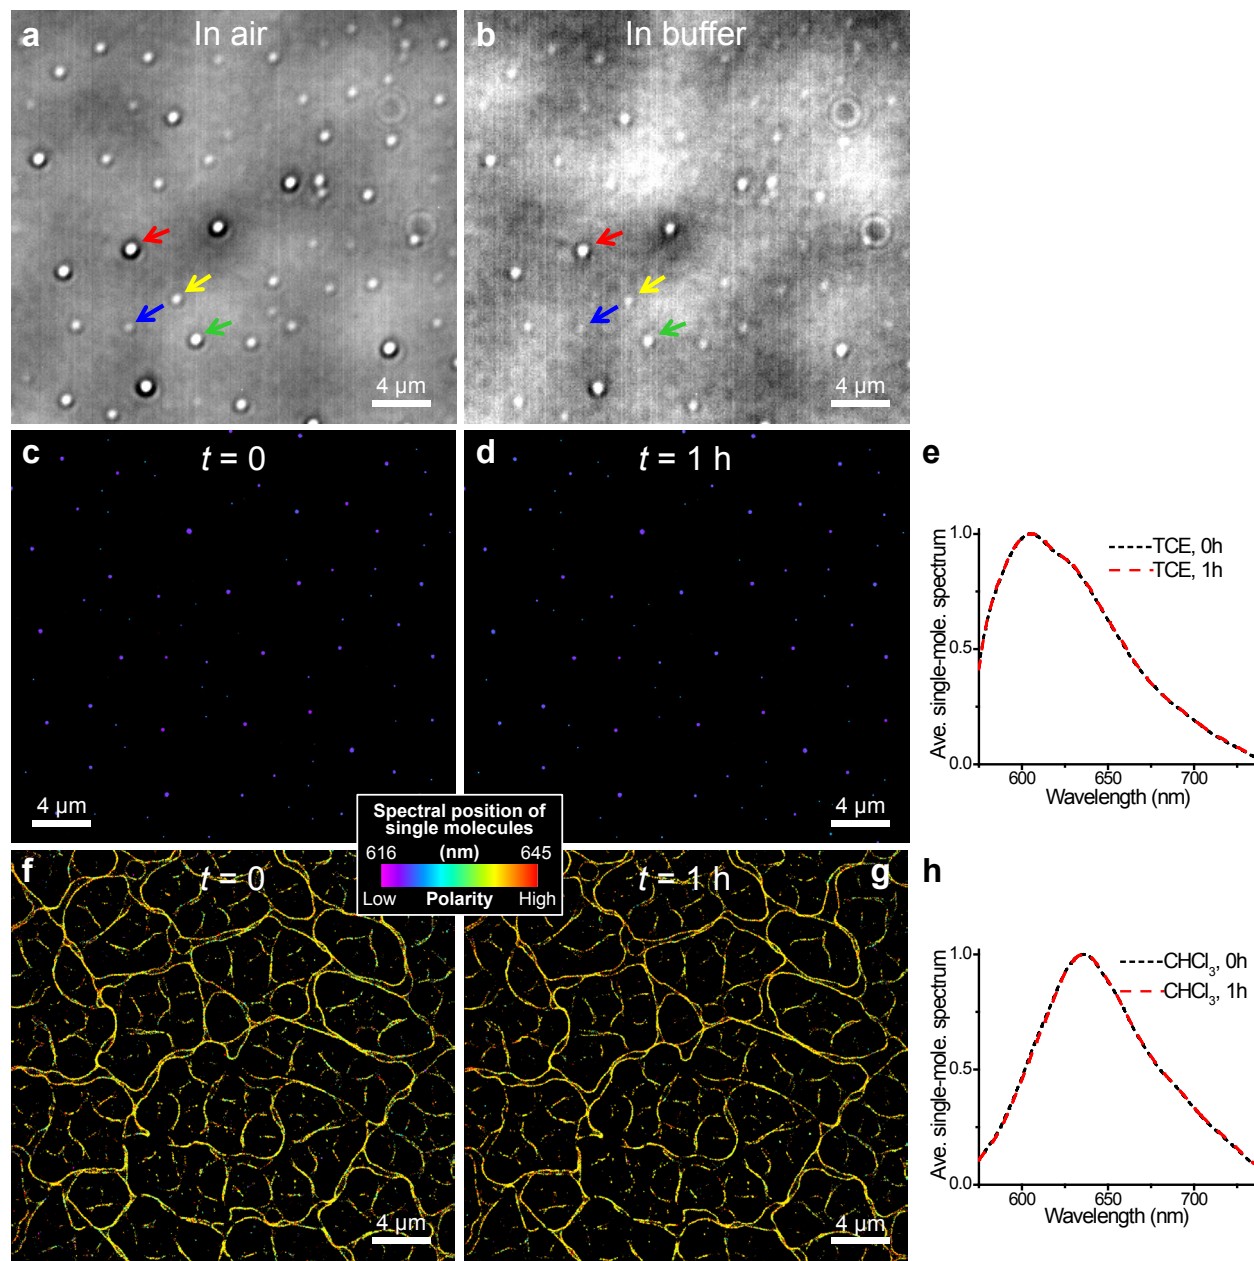

**Supplementary Figure 2 | The adlayers are highly stable under imaging conditions. a,** Differential interference contrast (DIC) microscopy of the as-prepared TCE adlayers on glass. Individual nanodroplets had similar apparent sizes of  $\sim 600$  nm, limited by the DIC resolution, but showed different contrasts due to differences in their actual sizes. **b,** DIC result after adding the imaging buffer. A global decrease in image contrast occurred due to the reduced difference in index of refraction between water and TCE vs. air and TCE; meanwhile, the adlayer structure was unchanged. Arrows point to the same, representative droplets. **c-h,** SR-PAINT images and averaged single-molecule spectra for TCE (**c-e**) and chloroform (**f-h**) adlayers taken at 1 h apart, showing structural stability down to nanoscale details, as well as unvarying spectra (and hence polarity) over time.



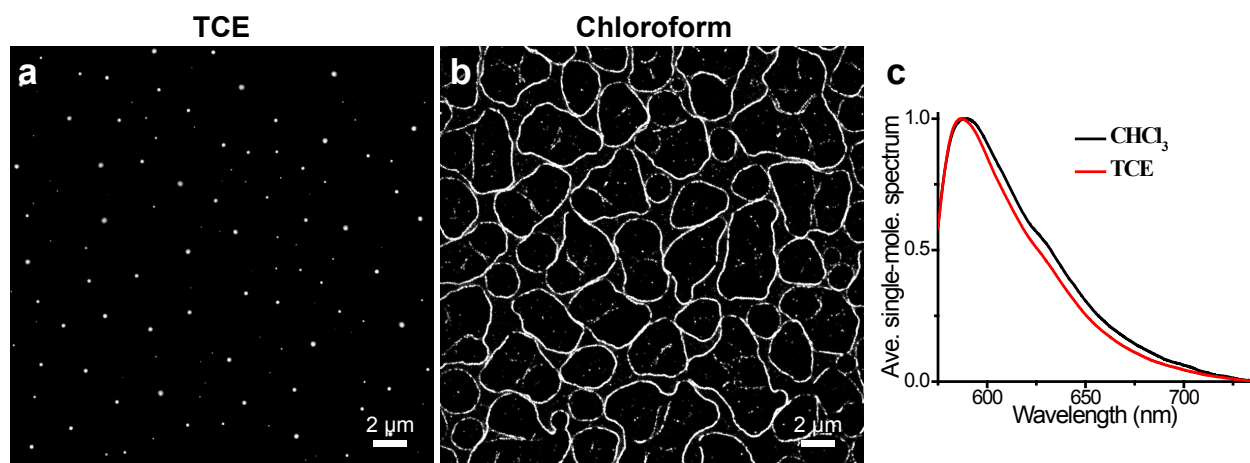

**Supplementary Figure 3 | SR-Paint results using Merocyanine 540. a-b**, Merocyanine 540 PAINt images of TCE (**a**) and chloroform (**b**) adlayers. **c**, Averaged single-molecule spectra for the TCE (red curve) and chloroform (black curve) adlayers, showing minimal shifts between the two adlayers when compared to results of Nile Red (Figs. 1d and 4c).

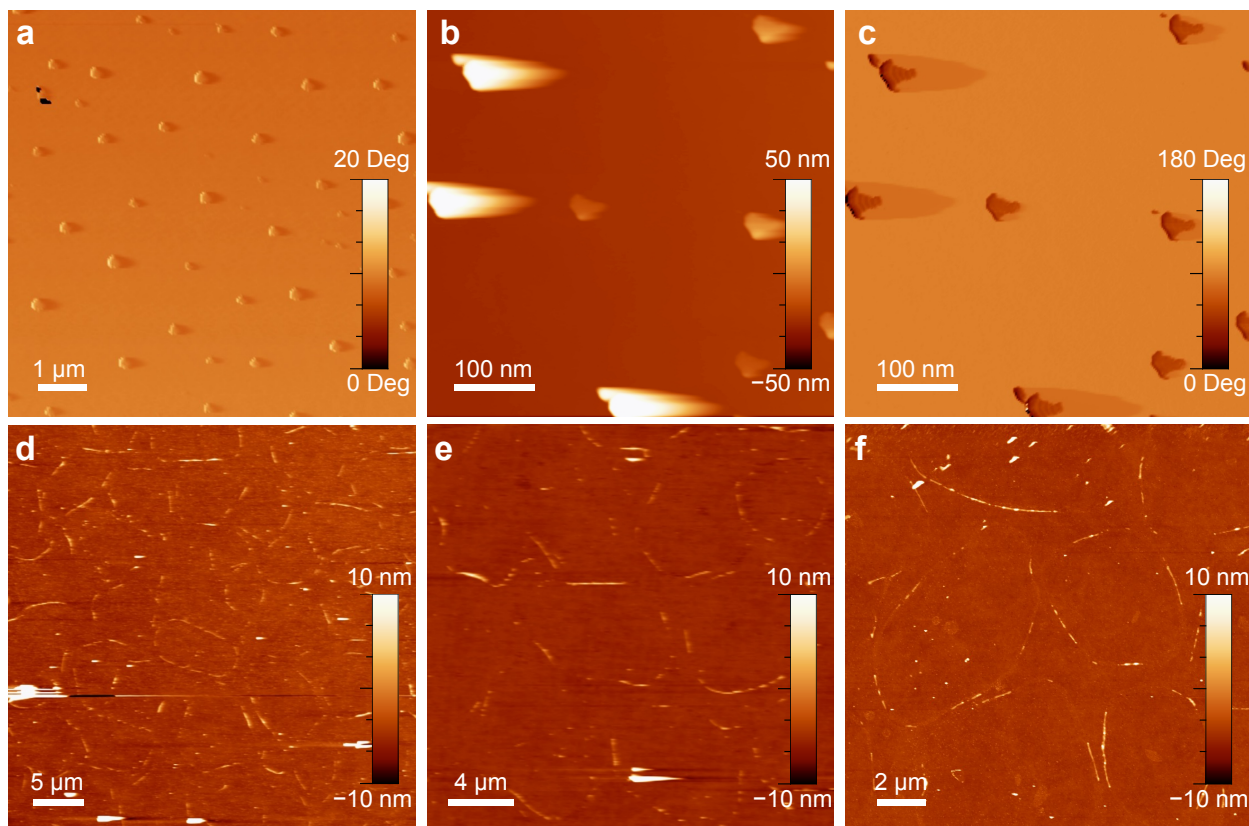

**Supplementary Figure 4 | Additional AFM images of TCE and chloroform adlayers. a-c,** TCE adlayers. **a**, AFM phase image corresponding to the height image in Fig. 2c. **b-c**, AFM height (**b**) and phase (**c**) images at high magnification. Droplets were severely deformed by the AFM tip. **d-f**, Chloroform adlayers. Height images at different magnifications all show incomplete circular network structures.

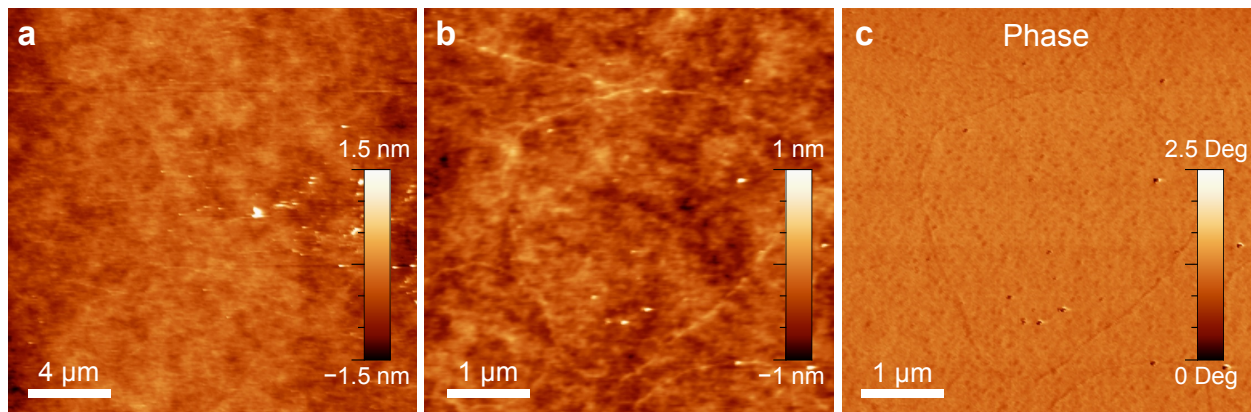

Chloroform, tapping mode with a stiffer, “standard” tip

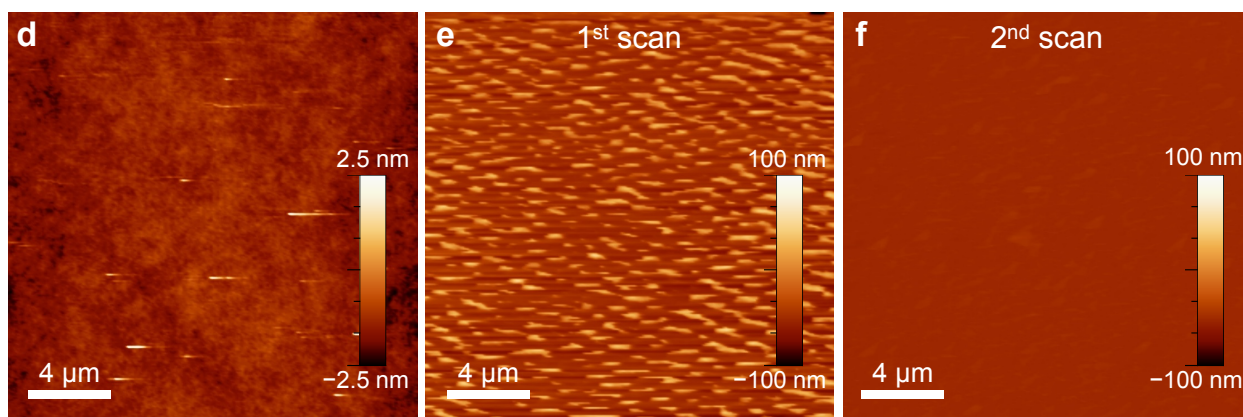

TCE, contact mode

Chloroform, contact mode

**Supplementary Figure 5 | AFM results under different modes.** **a-c**, Height (**a-b**) and phase (**c**) images of chloroform adlayers using a standard tapping-mode probe (nominal force constant:  $48 \text{ N}\cdot\text{m}^{-1}$ ). Reduced adlayer contrast was found: The nano-line structures were not visible at moderate magnifications (**a**) and were barely visible at high magnifications (**b-c**). **d-f**, Contact-mode height images of TCE (**d**) and chloroform (**e-f**) adlayers. **e-f** are two consecutive scans of the same area. The AFM tip severely dragged the adlayers along, and so no adlayers were correctly visualized. (**f**) further indicates that the AFM tip removed the adlayers from the surface during scanning.

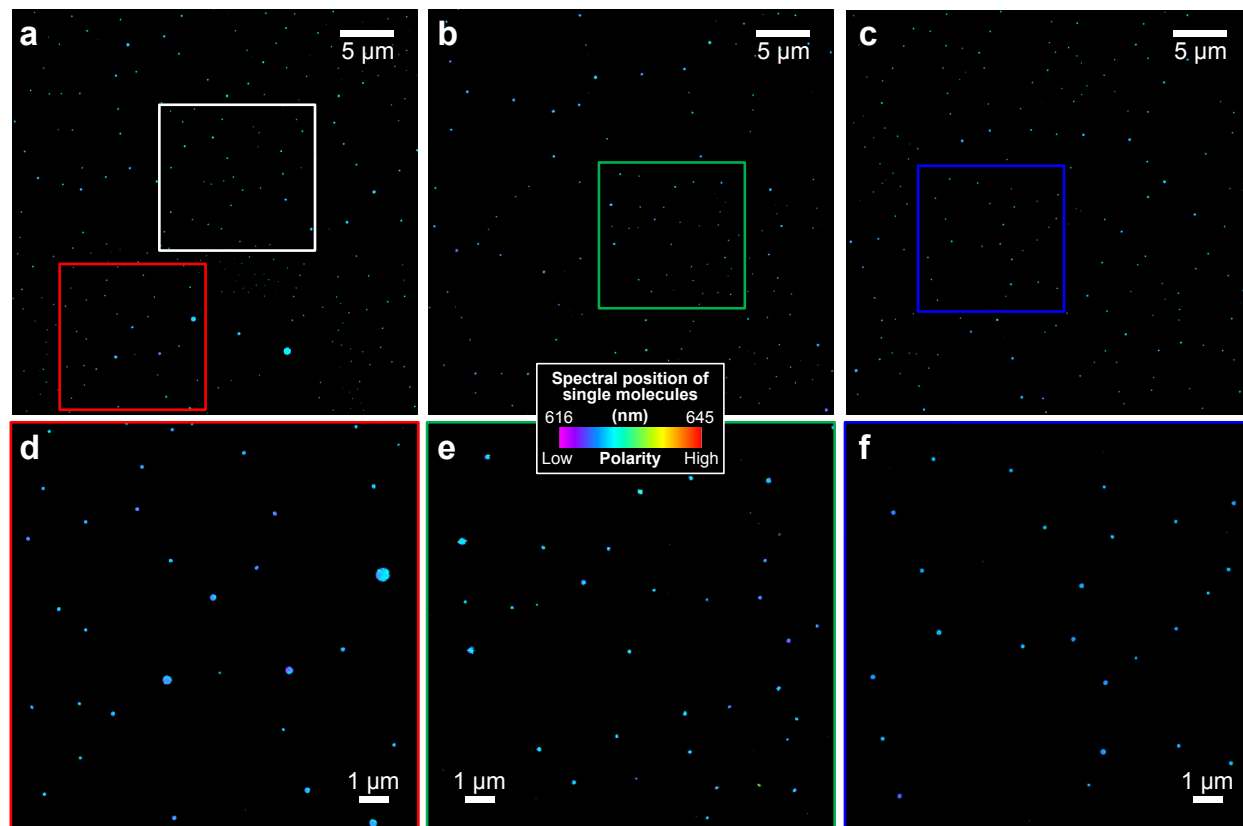

**Supplementary Figure 6 | Additional SR-PAINT images of tetrahydrothiophene adlayers.** White box in **a** corresponds to Fig. 3a. **d-f** are zoom-ins of the colored boxes in **a-c**, respectively.



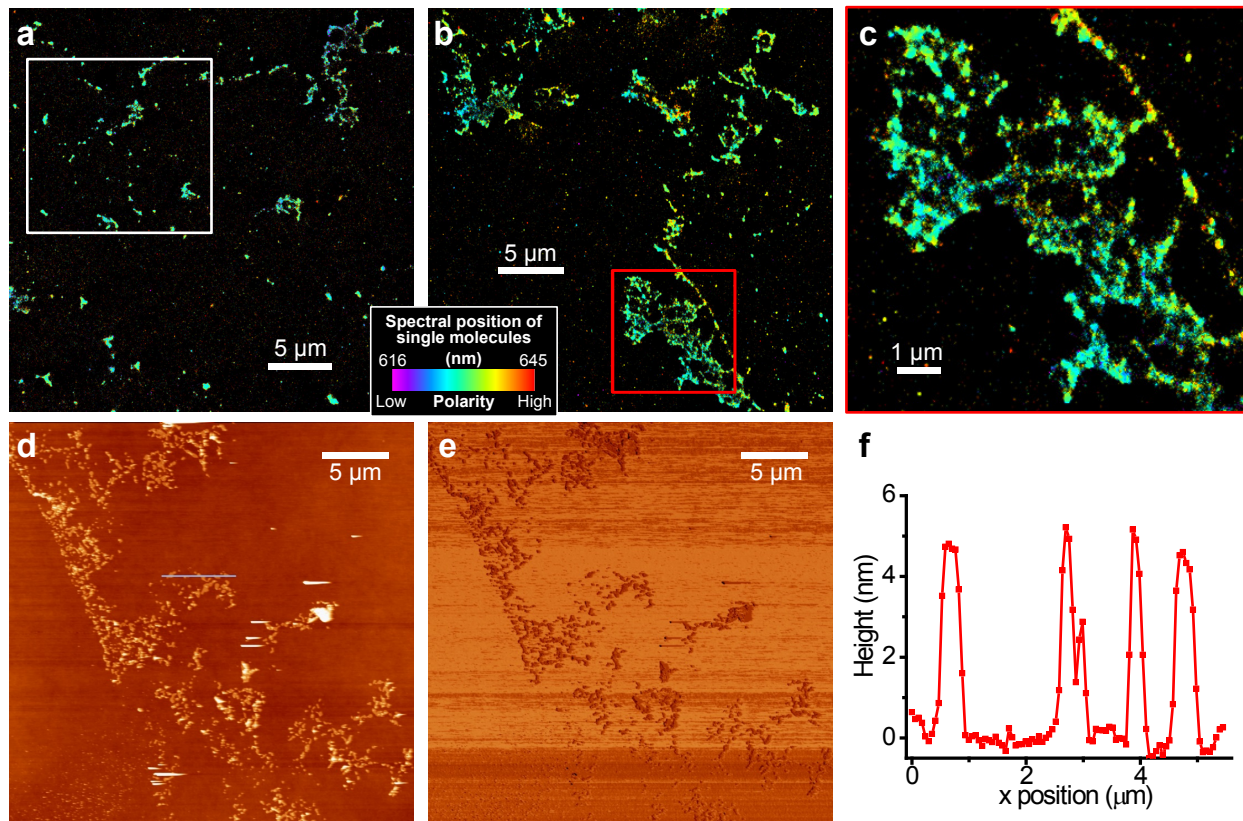

**Supplementary Figure 7 | Additional SR-PAINT images, and AFM images of ethyl acetate adlayers. a-c, SR-PAINT images. White box in a corresponds to Fig. 3b. c is a zoom-in of the red box in b. d-f, AFM height (d) and phase (e) images, and a height profile (f) along the line marked in d.**

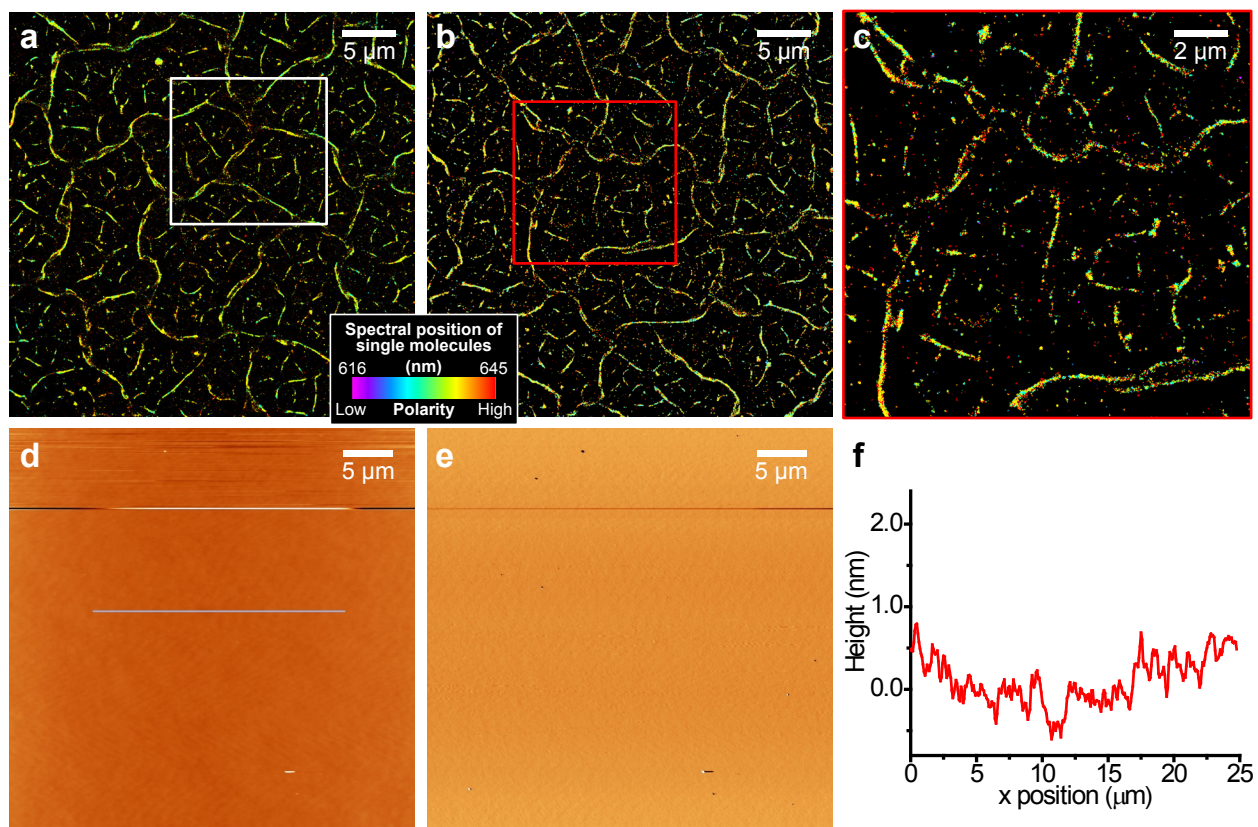

**Supplementary Figure 8 | Additional SR-PAINT images, and AFM images of dichloromethane adlayers.** a-c, SR-PAINT images. White box in a corresponds to Fig. 3c. c is a zoom-in of the red box in b. d-f, AFM height (d) and phase (e) images, and a height profile (f) along the line marked in d. No adlayer is detected in AFM, possibly due to the very low boiling point and high vapor pressure of dichloromethane.

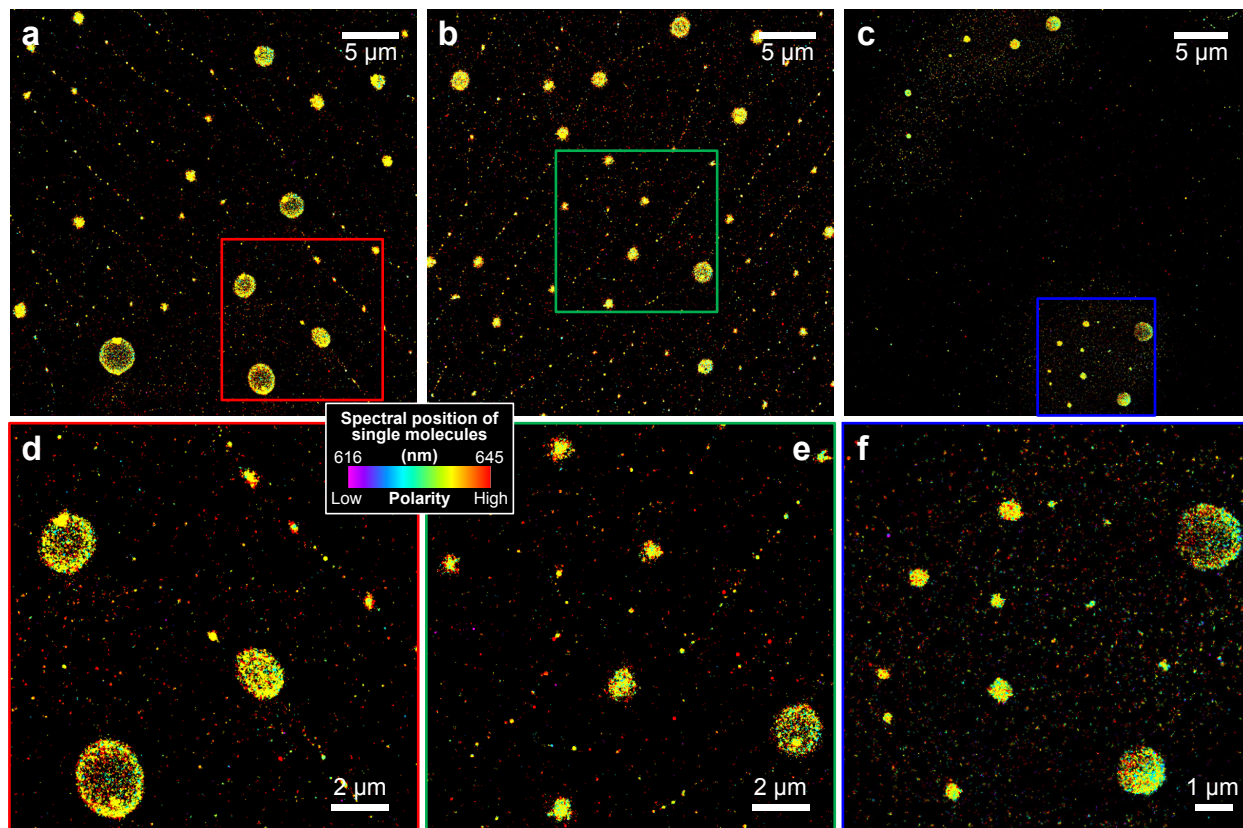

**Supplementary Figure 9 | SR-PAINT images of nitroethane adlayers. d-f are zoom-ins of the colored boxes in a-c, respectively.**



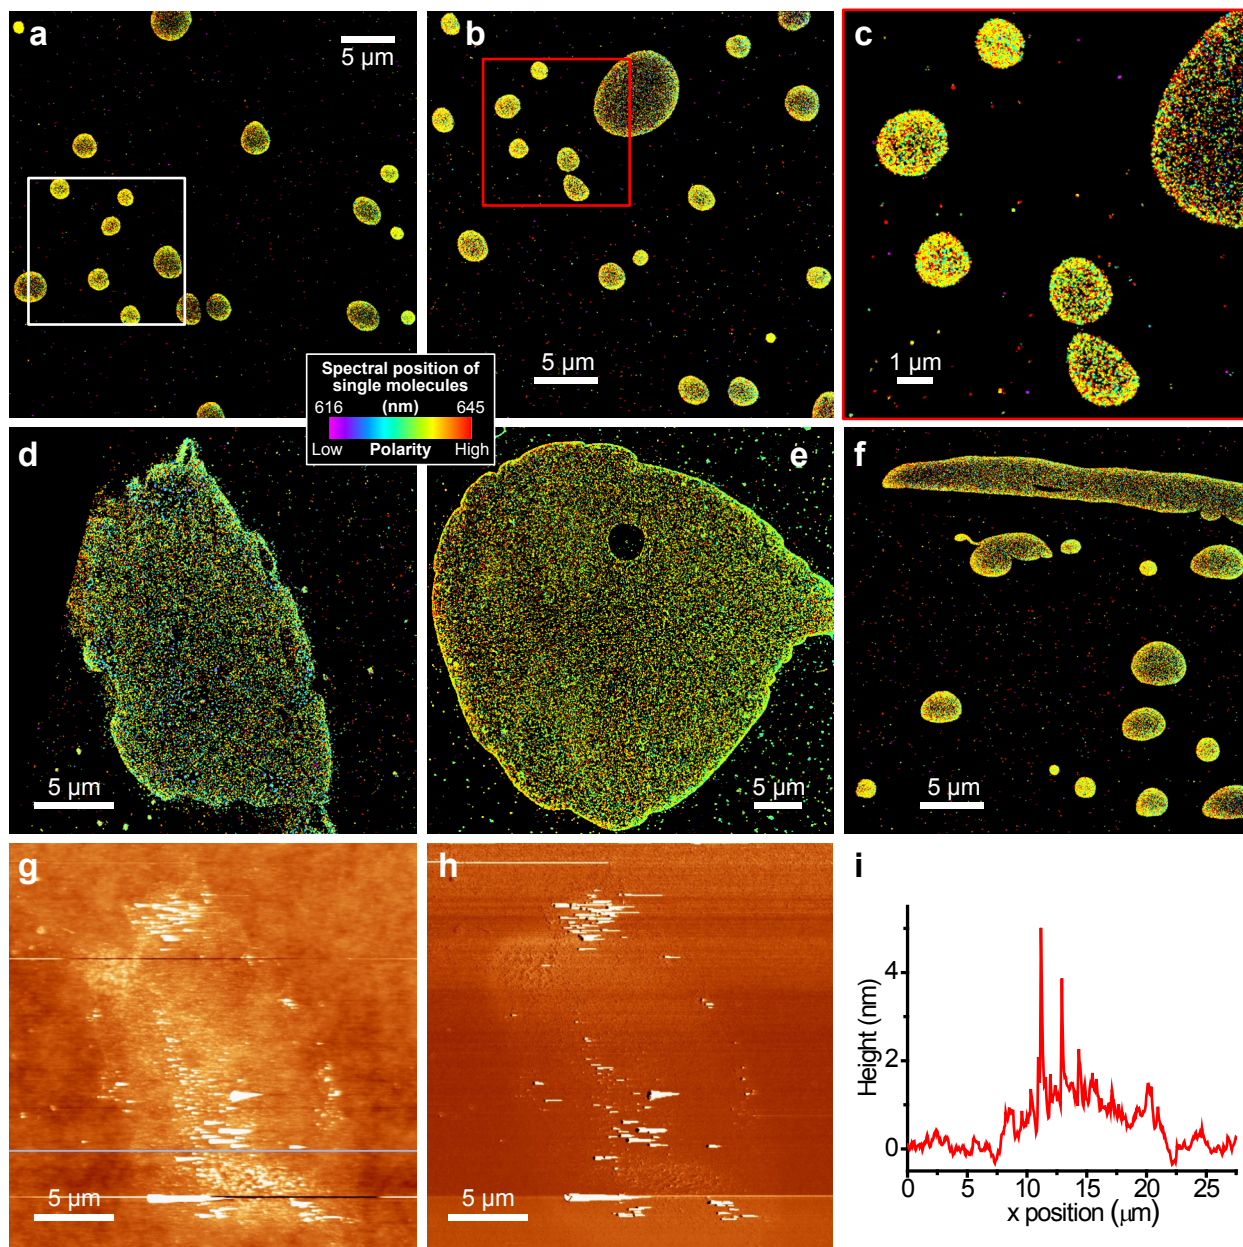

**Supplementary Figure 10 | Additional SR-Paint images, and AFM images of nitromethane adlayers. a-f, SR-Paint images. White box in a corresponds to Fig. 3d. c is a zoom-in of the red box in b. g-h, Correlated AFM height (g) and phase (h) images for the same adlayer shown in (d). i, Height profile across the line in panel g.**

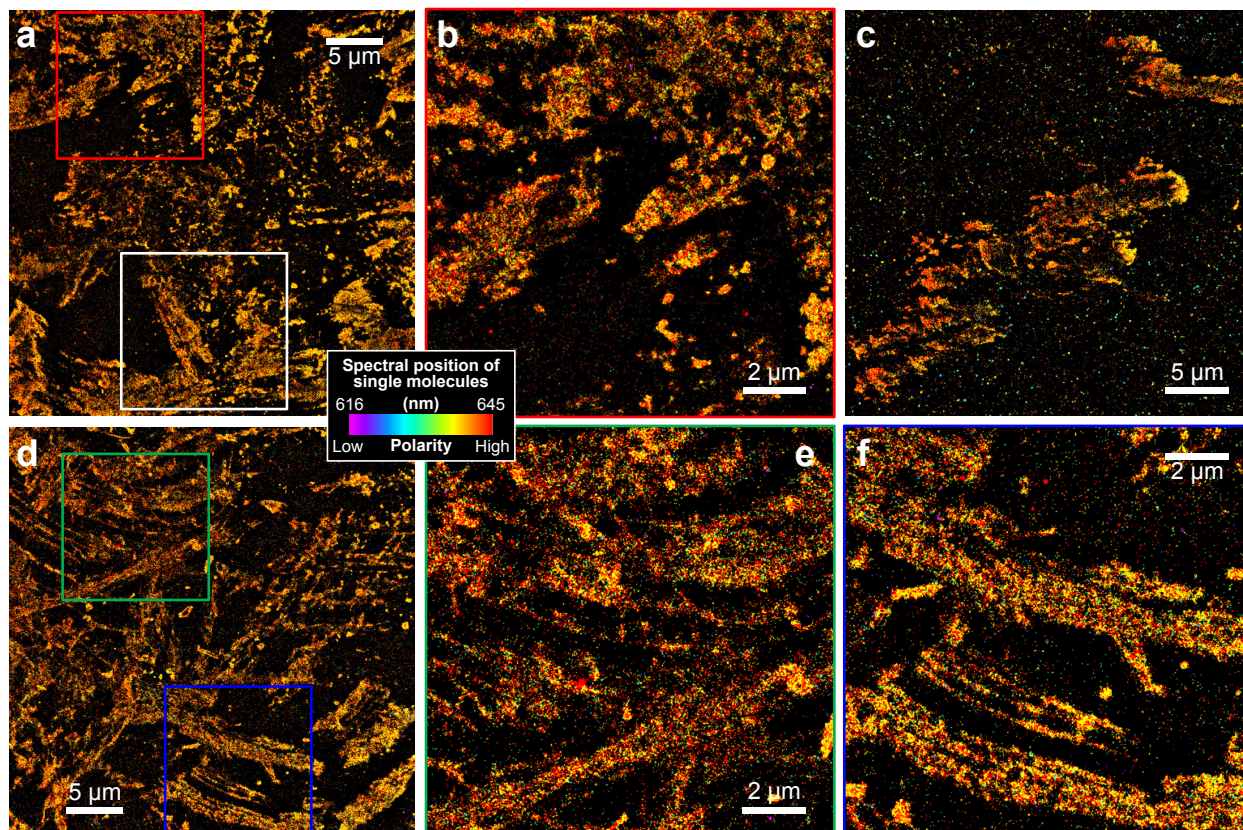

**Supplementary Figure 11 | Additional SR-PAINT images for ethyl acetoacetate adlayers.** **a,c,d**, Results of three representative samples. White box in **a** corresponds to Fig. 3e. **b** is a zoom-in of the red box in **a**. **e** and **f** are zoom-ins of the green and blue boxes in **d**, respectively.

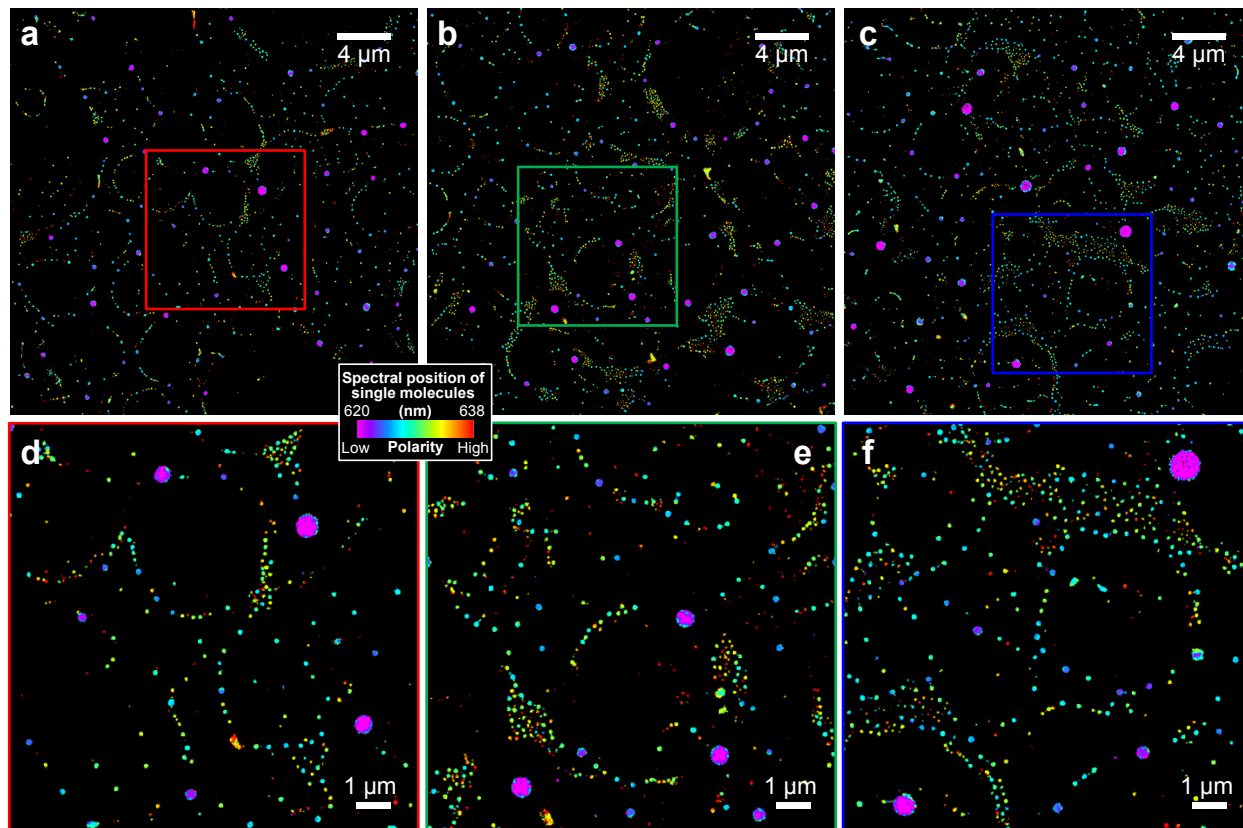

**Supplementary Figure 12 | Additional SR-PAINT results of the adlayers of a 1:3 TCE-chloroform mixture. d-f are zoom-ins of the colored boxes in a-c, respectively.**
